# Supplementary material for: A randomized, double-blind, placebo-controlled pilot study to assess bacterial anti-adhesive activity in human urine following consumption of a cranberry supplement
Source: Royal Society of Chemistry journal article supplement (doi:10.1039/c9fo01198f), 2019-01-01
Supplement: c9fo01198f1.pdf [file c9fo01198f1.pdf]

Electronic Supplementary Information

A Randomized, Double-Blind, Placebo-Controlled Pilot Study to Assess Bacterial Anti-Adhesive Activity in Human Urine Following Consumption of a Cranberry Supplement

Haiyan Liu<sup>1</sup>, Amy B. Howell<sup>2</sup>, Derek J. Zhang<sup>1</sup>, Christina Khoo<sup>1\*</sup>

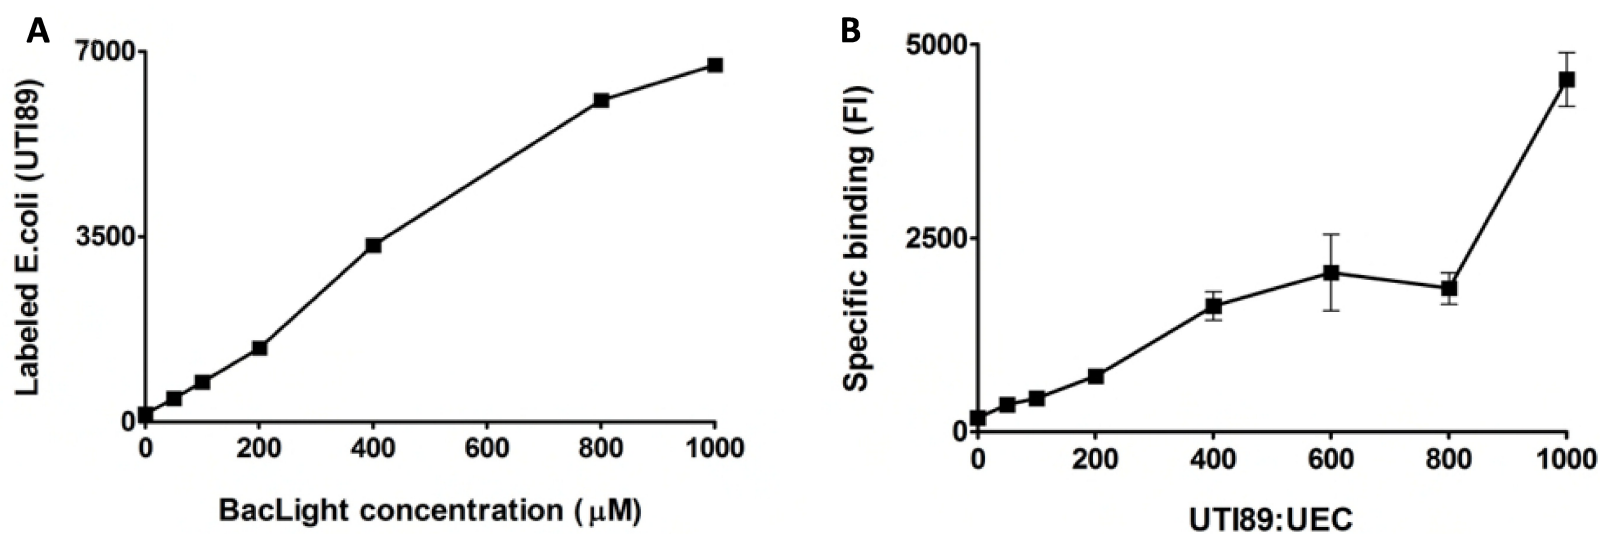

Figure S1. (A) Specific labeling of *E. coli* UTI89 increased with BacLight Green concentration. The optimum BacLight Green concentration was determined as 1000 μM. (B) Specific binding of fluorescent-labeled *E. coli* UTI89 to uroepithelial cells with increasing ratios of *E. coli* UTI89:uroepithelial cells. The optimum ratio was determined as 600:1.
